# Supplementary material for: Integration of Transcriptomics and Metabolomics for Understanding the Different Vegetative Growth in Morchella Sextelata
Source: Front Genet. 2022 Feb 4;12:829379. doi: 10.3389/fgene.2021.829379 (PMC8854800; doi:10.3389/fgene.2021.829379)
Supplement: Supplementary file 4 [file Table3.XLS]

## Sheet: pattern of metabolites
Name_des	Name	Class	kegg
Down-Down	D-Fructose-1,6-biphosphate	Com_28_neg	Carbohydrates
Down-Down	Betulinic acid	Com_44_neg	Lipids and lipid-like molecules
Down-Down	D-Mannose-6-phosphate	Com_51_neg	Carbohydrates
Down-Down	Flavin Adenine Dinucleotide	Com_85_neg	Nucleotide And Its Derivates	map00740 Riboflavin metabolism;map01100 Metabolic pathways;map01110 Biosynthesis of secondary metabolites
Down-Down	Parishin E	Com_86_neg	Phenols
Down-Down	D-(+)-Glucono-1,5-lactone	Com_106_neg	Carbohydrates
Down-Down	Campesterol	Com_169_pos	Lipids and lipid-like molecules	map00100 Steroid biosynthesis;map01100 Metabolic pathways;map01110 Biosynthesis of secondary metabolites
Down-Down	Stachydrine	Com_185_pos	Alkaloids
Down-Down	Thymidine	Com_301_pos	Nucleotide And Its Derivates	map00240 Pyrimidine metabolism;map01100 Metabolic pathways
Down-Down	LysoPC 20:0 (2n isomer)	Com_383_pos	Glycerophospholipids
Down-Down	N-Acetylglucosamine 1-phosphate	Com_130_neg	Others
Down-Down	LPC(1-acyl 16:0)	Com_236_pos	Fatty acid
Down-Down	Dihydroxyacetone phosphate	Com_101_neg	Organic Acid And Its Derivatives	map00010 Glycolysis / Gluconeogenesis;map00040 Pentose and glucuronate interconversions;map00051 Fructose and mannose metabolism;map00052 Galactose metabolism;map00561 Glycerolipid metabolism;map00562 Inositol phosphate metabolism;map00564 Glycerophospholipid metabolism;map00640 Propanoate metabolism;map00680 Methane metabolism;map00760 Nicotinate and nicotinamide metabolism;map01100 Metabolic pa…
Down-Down	LPC(1-acyl 16:2)	Com_238_pos	Fatty acid
Down-Down	Dl-2-Aminooctanoic Acid	Com_283_pos	Organic Acid And Its Derivatives
Down-Down	Leucine derivative	Com_278_pos	Amino Acid And Its Derivatives
Down-Down	D-3-Phosphoglyceric acid	Com_20_neg	Fatty acid
Down-Down	γ,γ-Dimethylallyl pyrophosphate	Com_58_neg	Others
Down-Down	D-Glucose 6-phosphate	Com_81_neg	Carbohydrates	map00500 Starch and sucrose metabolism;map00562 Inositol phosphate metabolism;map01100 Metabolic pathways;map01130 Biosynthesis of antibiotics
Down-Down	Sophoricoside	Com_192_pos	Flavonoids
Down-Down	Uridine 5'-monophosphate	Com_26_neg	Nucleotide and its derivates	map00240 Pyrimidine metabolism;map01100 Metabolic pathways
Down-Down	O-Phosphocholine	Com_226_pos	Others	map00564 Glycerophospholipid metabolism;map01100 Metabolic pathways
Down-Down	L-(+)-Tartaric acid	Com_33_neg	Organic Acid And Its Derivatives
Down-Up	Baicalin	Com_150_neg	Flavonoids
Down-Up	5'-Deoxy-5'-(Methylthio)Adenosine	Com_243_pos	Nucleotide And Its Derivates
Down-Up	Acetaminophen	Com_248_pos	Phenols
Down-Up	Adenosine O-ribose	Com_326_pos	Nucleic acid derivative
Down-Up	N,N-Dimethylglycine	Com_57_neg	Amino Acid And Its Derivatives	map00260 Glycine, serine and threonine metabolism;map01100 Metabolic pathways
Down-Up	Thiamin	Com_303_pos	Vitamins	map00730 Thiamine metabolism;map01100 Metabolic pathways;map02010 ABC transporters;map04122 Sulfur relay system
Down-Up	Cytidine-5-Monophosphate	Com_362_pos	Nucleotide And Its Derivates
Down-Up	2-Phenylglycine	Com_294_pos	Amino Acid And Its Derivatives
Up-Down	Thiamine pyrophosphate	Com_3_neg	Vitamins
Up-Down	Dihydromyricetin	Com_16_neg	Flavonol	map01110 Biosynthesis of secondary metabolites
Up-Down	AMP	Com_94_neg	Nucleotide And Its Derivates	map00230 Purine metabolism;map01100 Metabolic pathways;map01110 Biosynthesis of secondary metabolites;map01130 Biosynthesis of antibiotics
Up-Down	Tryptophanol	Com_257_pos	Indole And Its Derivatives
Up-Down	Diosmetin	Com_282_pos	Flavonoids
Up-Down	deoxyguanosine 5'-monophosphate (dGMP)	Com_75_neg	Nucleotide And Its Derivates
Up-Down	Adenosine 3'-Monophosphate	Com_325_pos	Nucleotide And Its Derivates
Up-Down	Kinsenoside	Com_8_neg	TCM
Up-Down	5-phosphoribosyl-1-pyrophosphate	Com_90_neg	Organic oxygen compounds
Up-Down	Vitamin D3	Com_127_neg	Vitamins	map00100 Steroid biosynthesis;map01100 Metabolic pathways
Up-Up	D-Malic Acid	Com_50_neg	Tca Cycle
Up-Up	N6-Acetyl-L-Lysine	Com_167_pos	Amino Acid And Its Derivatives
Up-Up	L-Pipecolic Acid	Com_313_pos	Amino Acid And Its Derivatives
Up-Up	Ng,Ng-Dimethylarginine	Com_396_pos	Amino Acid And Its Derivatives
Up-Up	Fumaric Acid	Com_40_neg	Tca Cycle	map00020 Citrate cycle (TCA cycle);map00190 Oxidative phosphorylation;map00220 Arginine biosynthesis;map00250 Alanine, aspartate and glutamate metabolism;map00350 Tyrosine metabolism;map00360 Phenylalanine metabolism;map00620 Pyruvate metabolism;map00650 Butanoate metabolism;map00760 Nicotinate and nicotinamide metabolism;map01100 Metabolic pathways
Up-Up	Tryptamine	Com_258_pos	Alkaloids	map00380 Tryptophan metabolism;map01100 Metabolic pathways;map01110 Biosynthesis of secondary metabolites
Up-Up	L-Citrulline	Com_356_pos	Amino Acid And Its Derivatives	map00220 Arginine biosynthesis;map01100 Metabolic pathways;map01110 Biosynthesis of secondary metabolites;map01130 Biosynthesis of antibiotics;map01230 Biosynthesis of amino acids
Up-Up	Methylmalonic Acid	Com_24_neg	Organic Acid And Its Derivatives	map00240 Pyrimidine metabolism;map00280 Valine, leucine and isoleucine degradation;map00640 Propanoate metabolism
Up-Up	Methoxy indoleacetic acid	Com_199_pos	Phytohormones
Up-Up	Methylophiopogonanone A	Com_25_neg	Flavonoids
Up-Up	2-Methyladenosine	Com_292_pos	Nucleic acid derivative
Up-Up	D-Arabitol	Com_331_pos	Sugar Alcohols	map00040 Pentose and glucuronate interconversions;map01100 Metabolic pathways
